# Supplementary material
Source: PubMed Central journal article supplement (PMC5503810)

# Figure 1

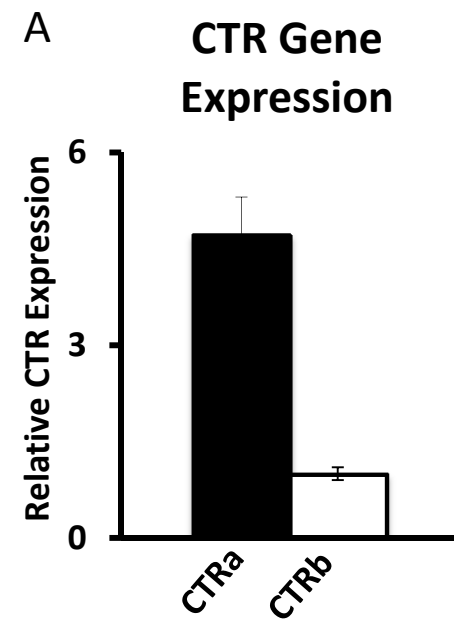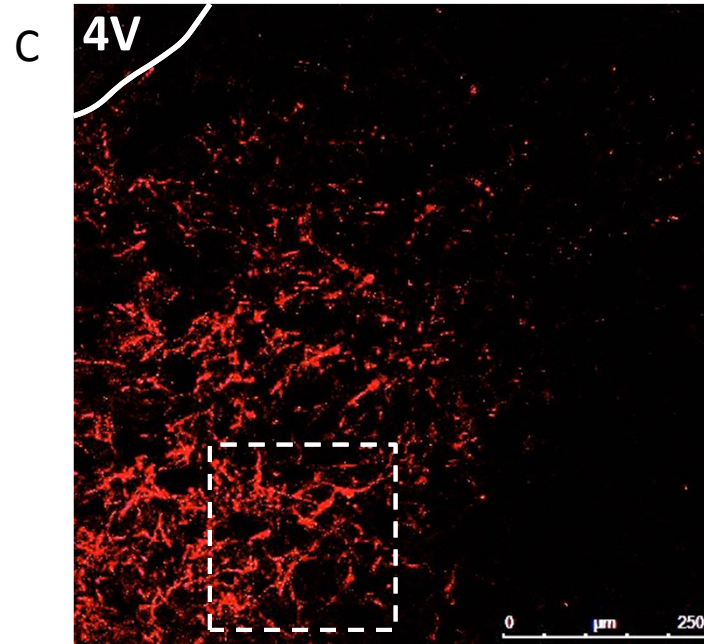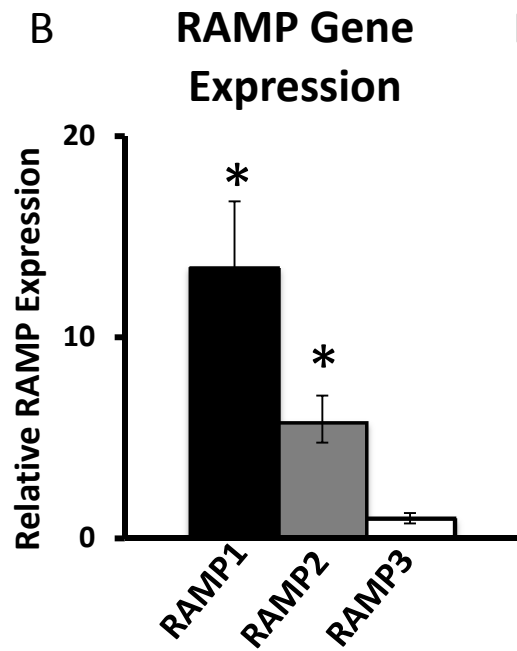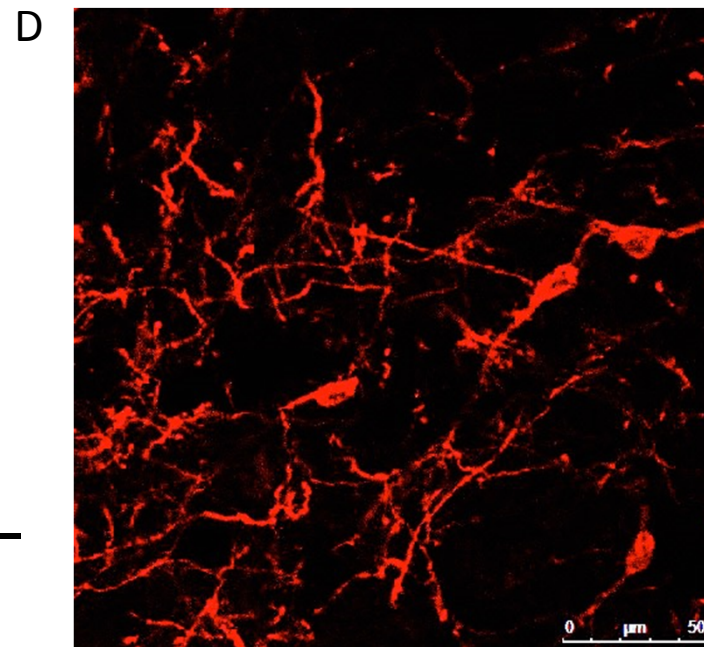

Supplement: NIHMS842459-supplement-1.pdf [file NIHMS842459-supplement-1.pdf]

Figure 2

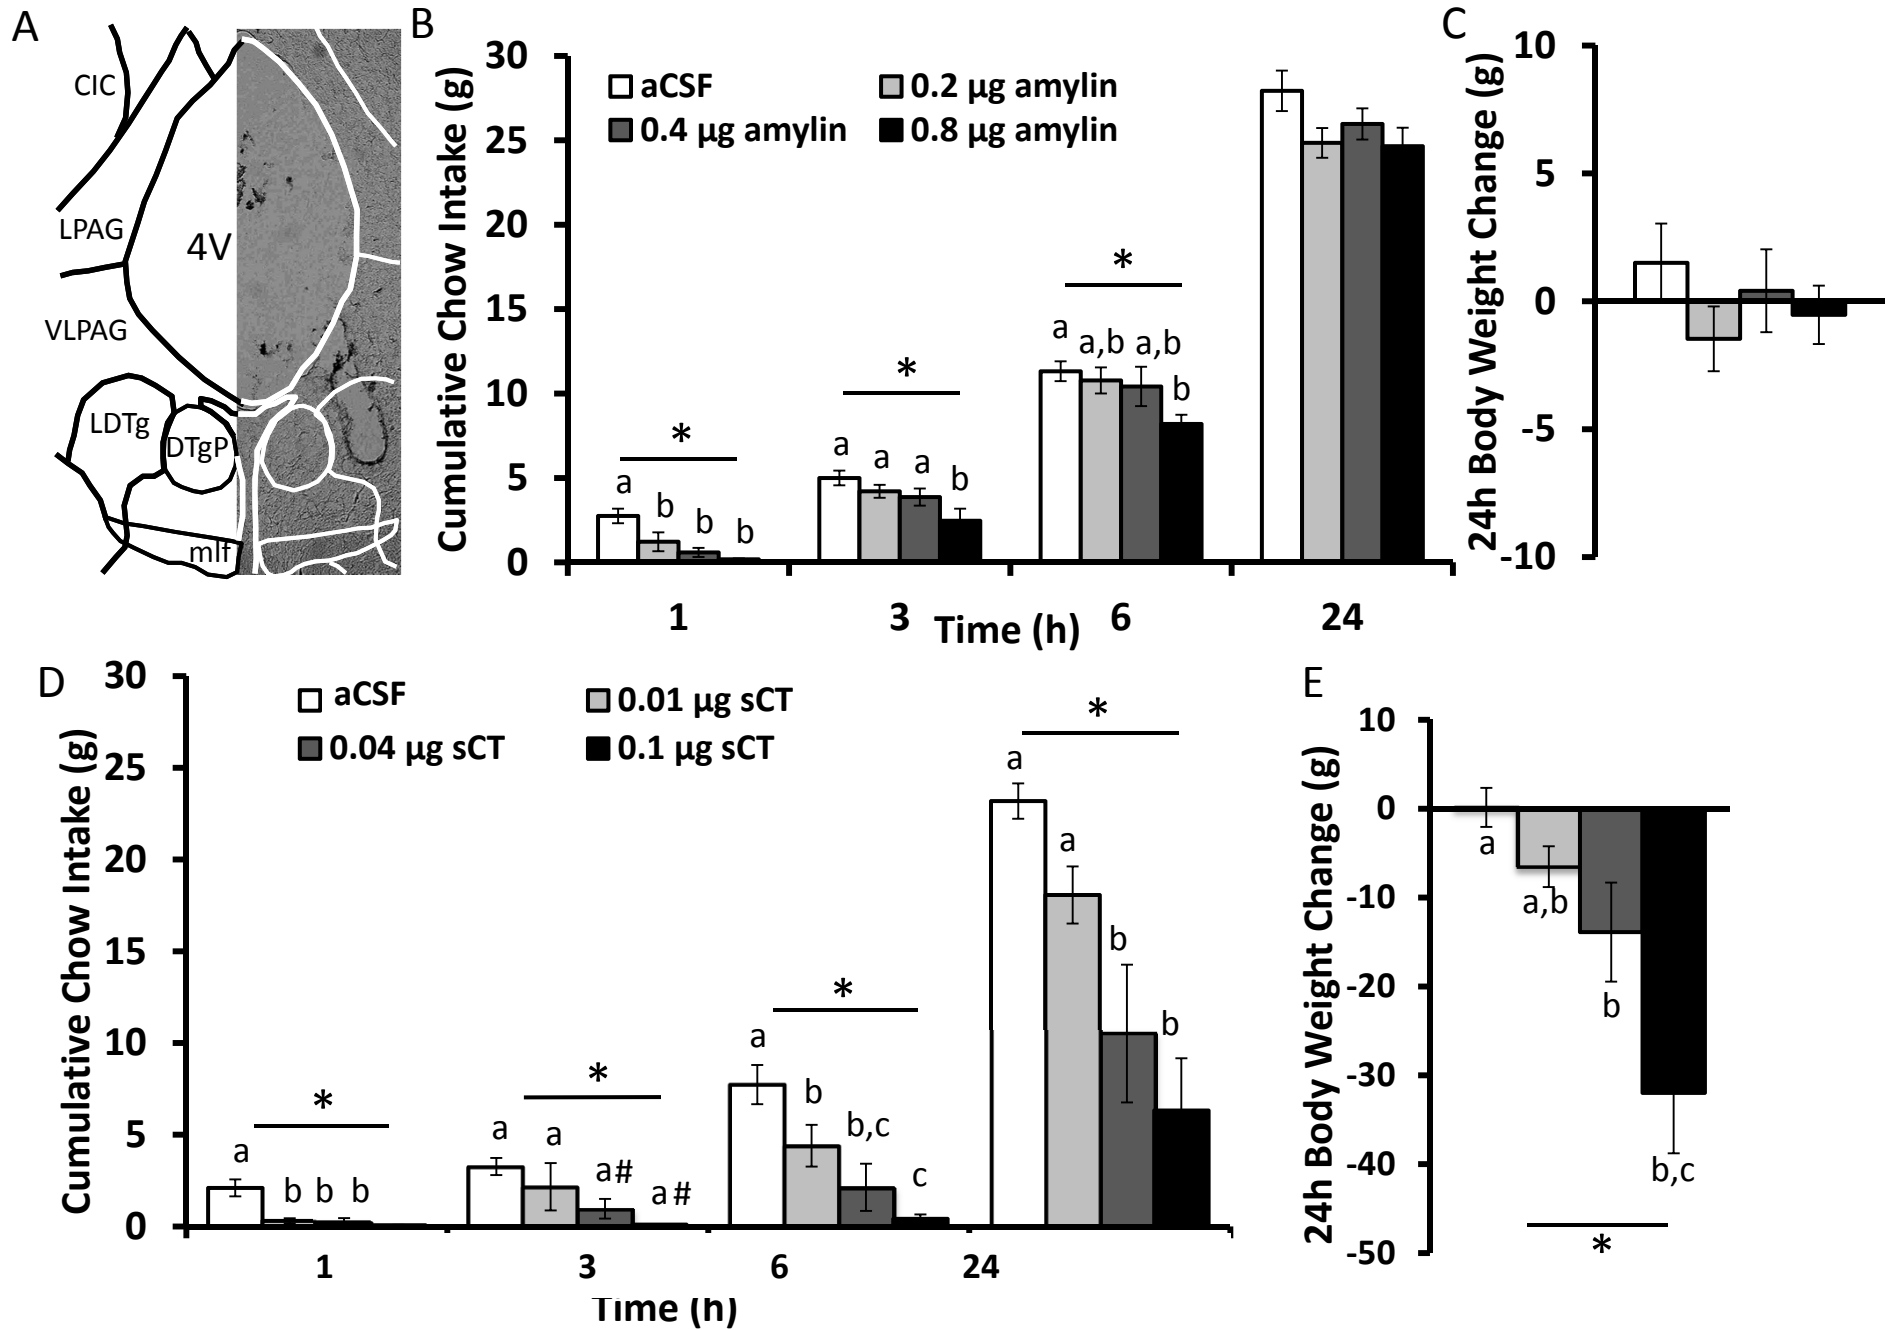

Supplement: NIHMS842459-supplement-2.pdf [file NIHMS842459-supplement-2.pdf]

# Figure 3

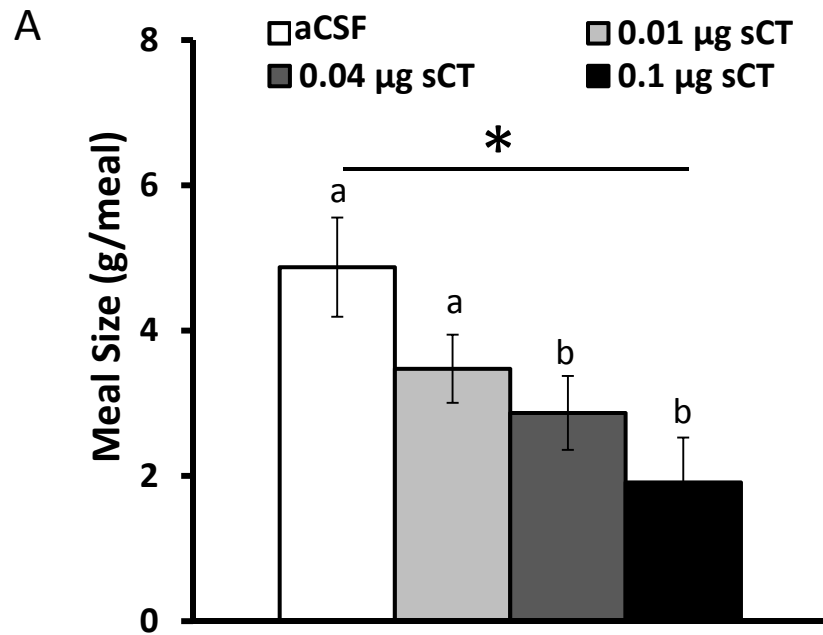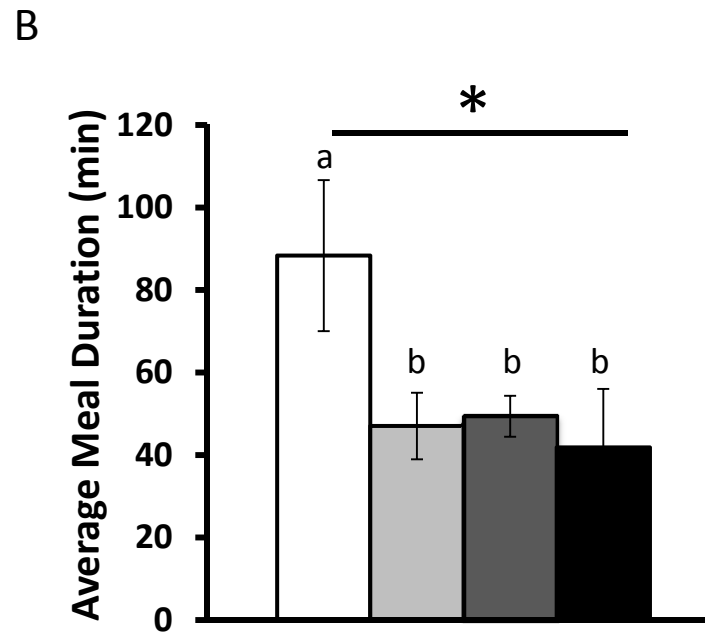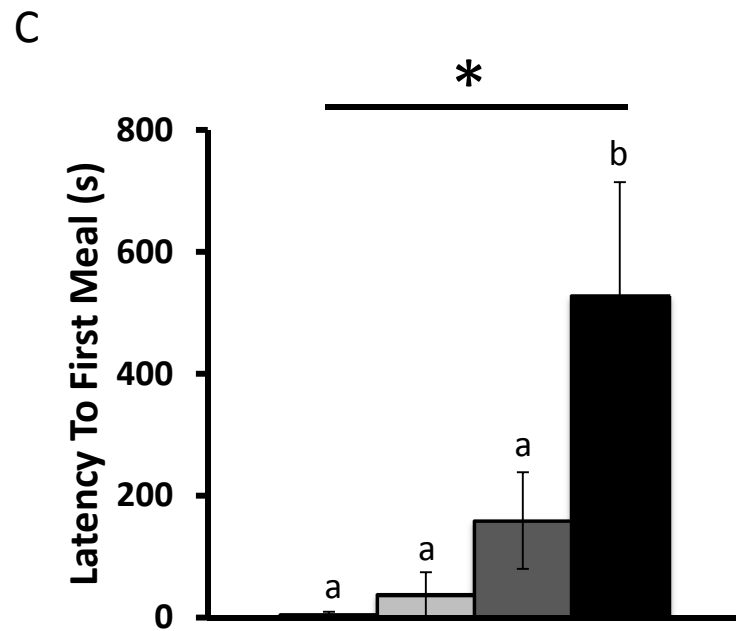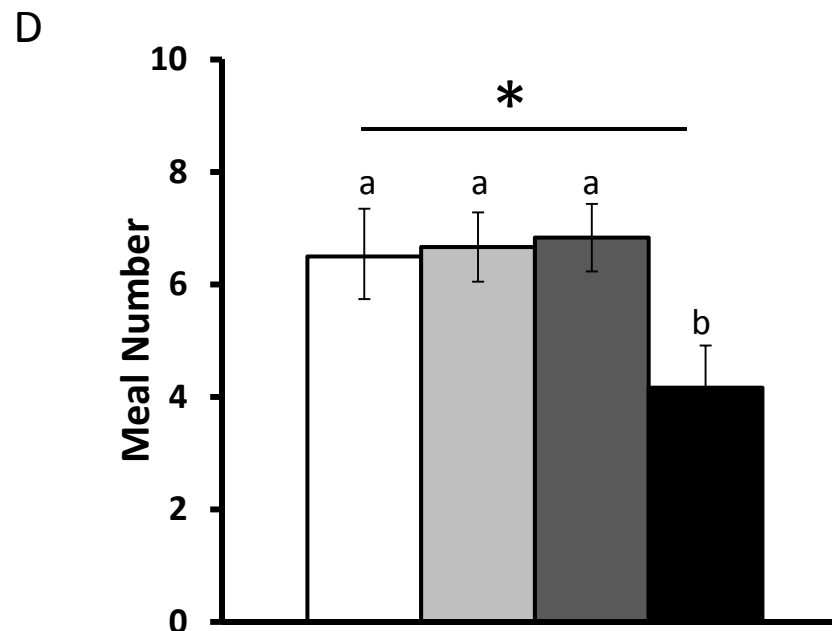

Supplement: NIHMS842459-supplement-3.pdf [file NIHMS842459-supplement-3.pdf]

Figure 4

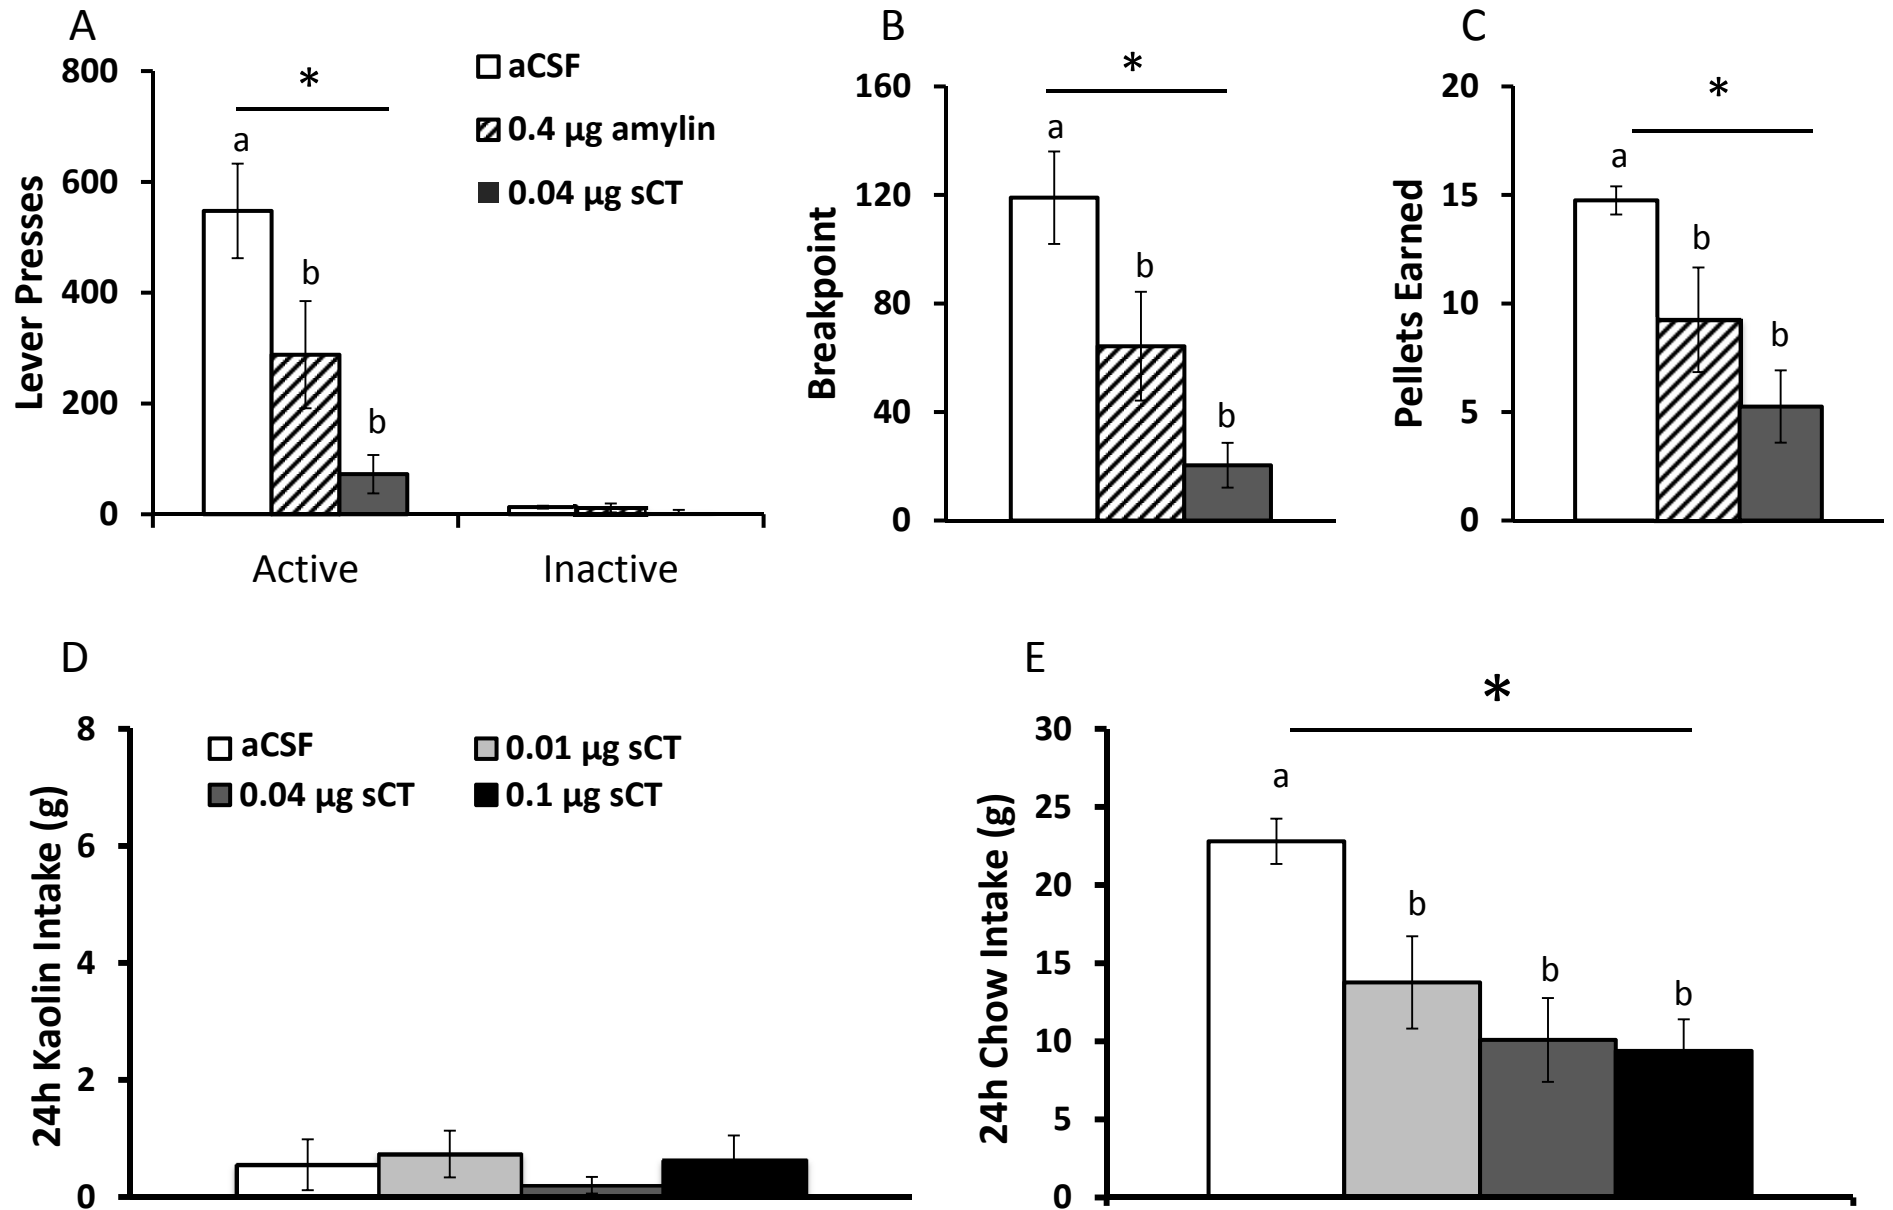

Supplement: NIHMS842459-supplement-4.pdf [file NIHMS842459-supplement-4.pdf]

Figure 5

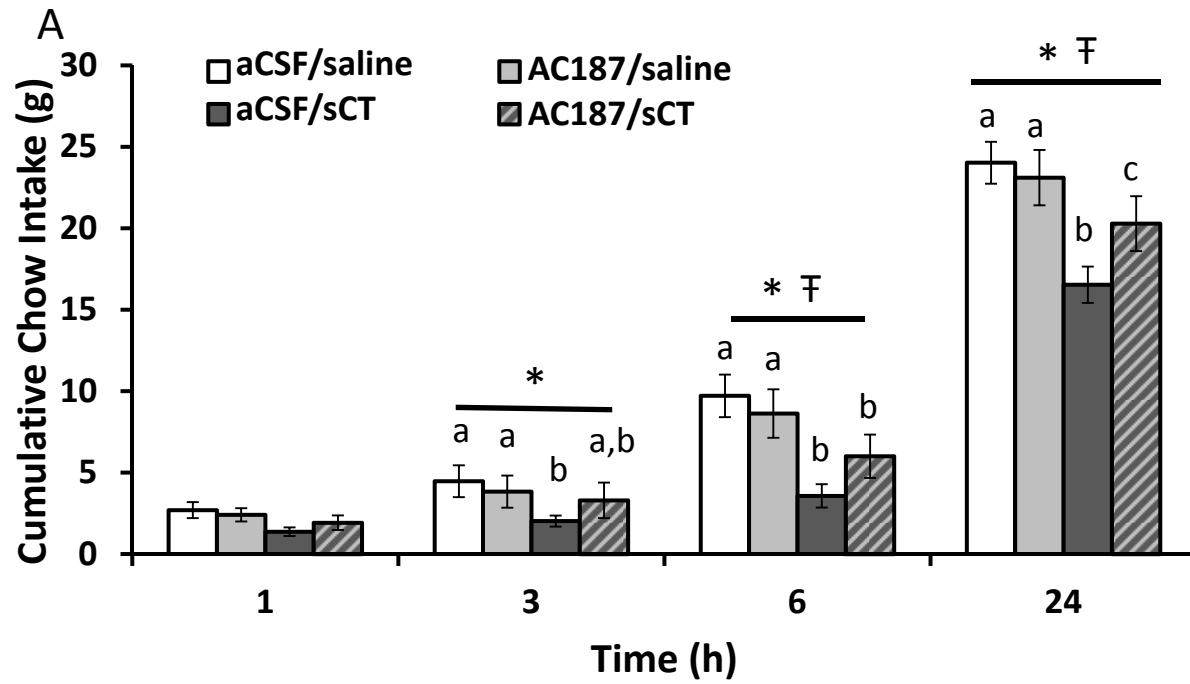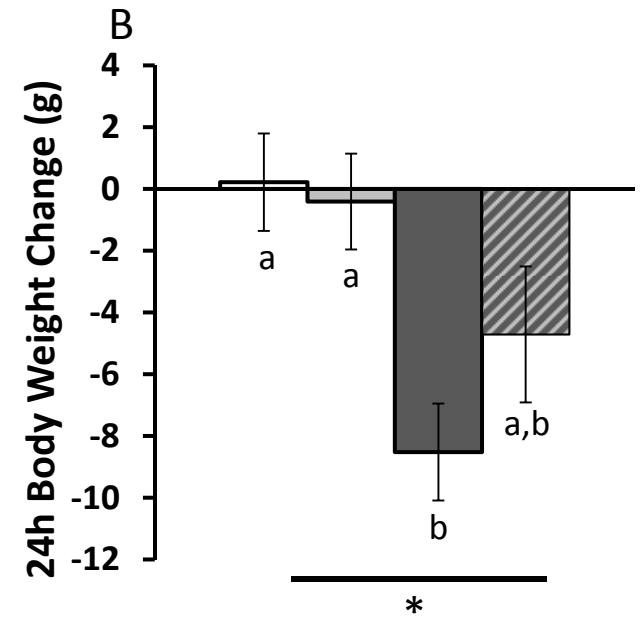

Supplement: NIHMS842459-supplement-5.pdf [file NIHMS842459-supplement-5.pdf]

# Figure 6

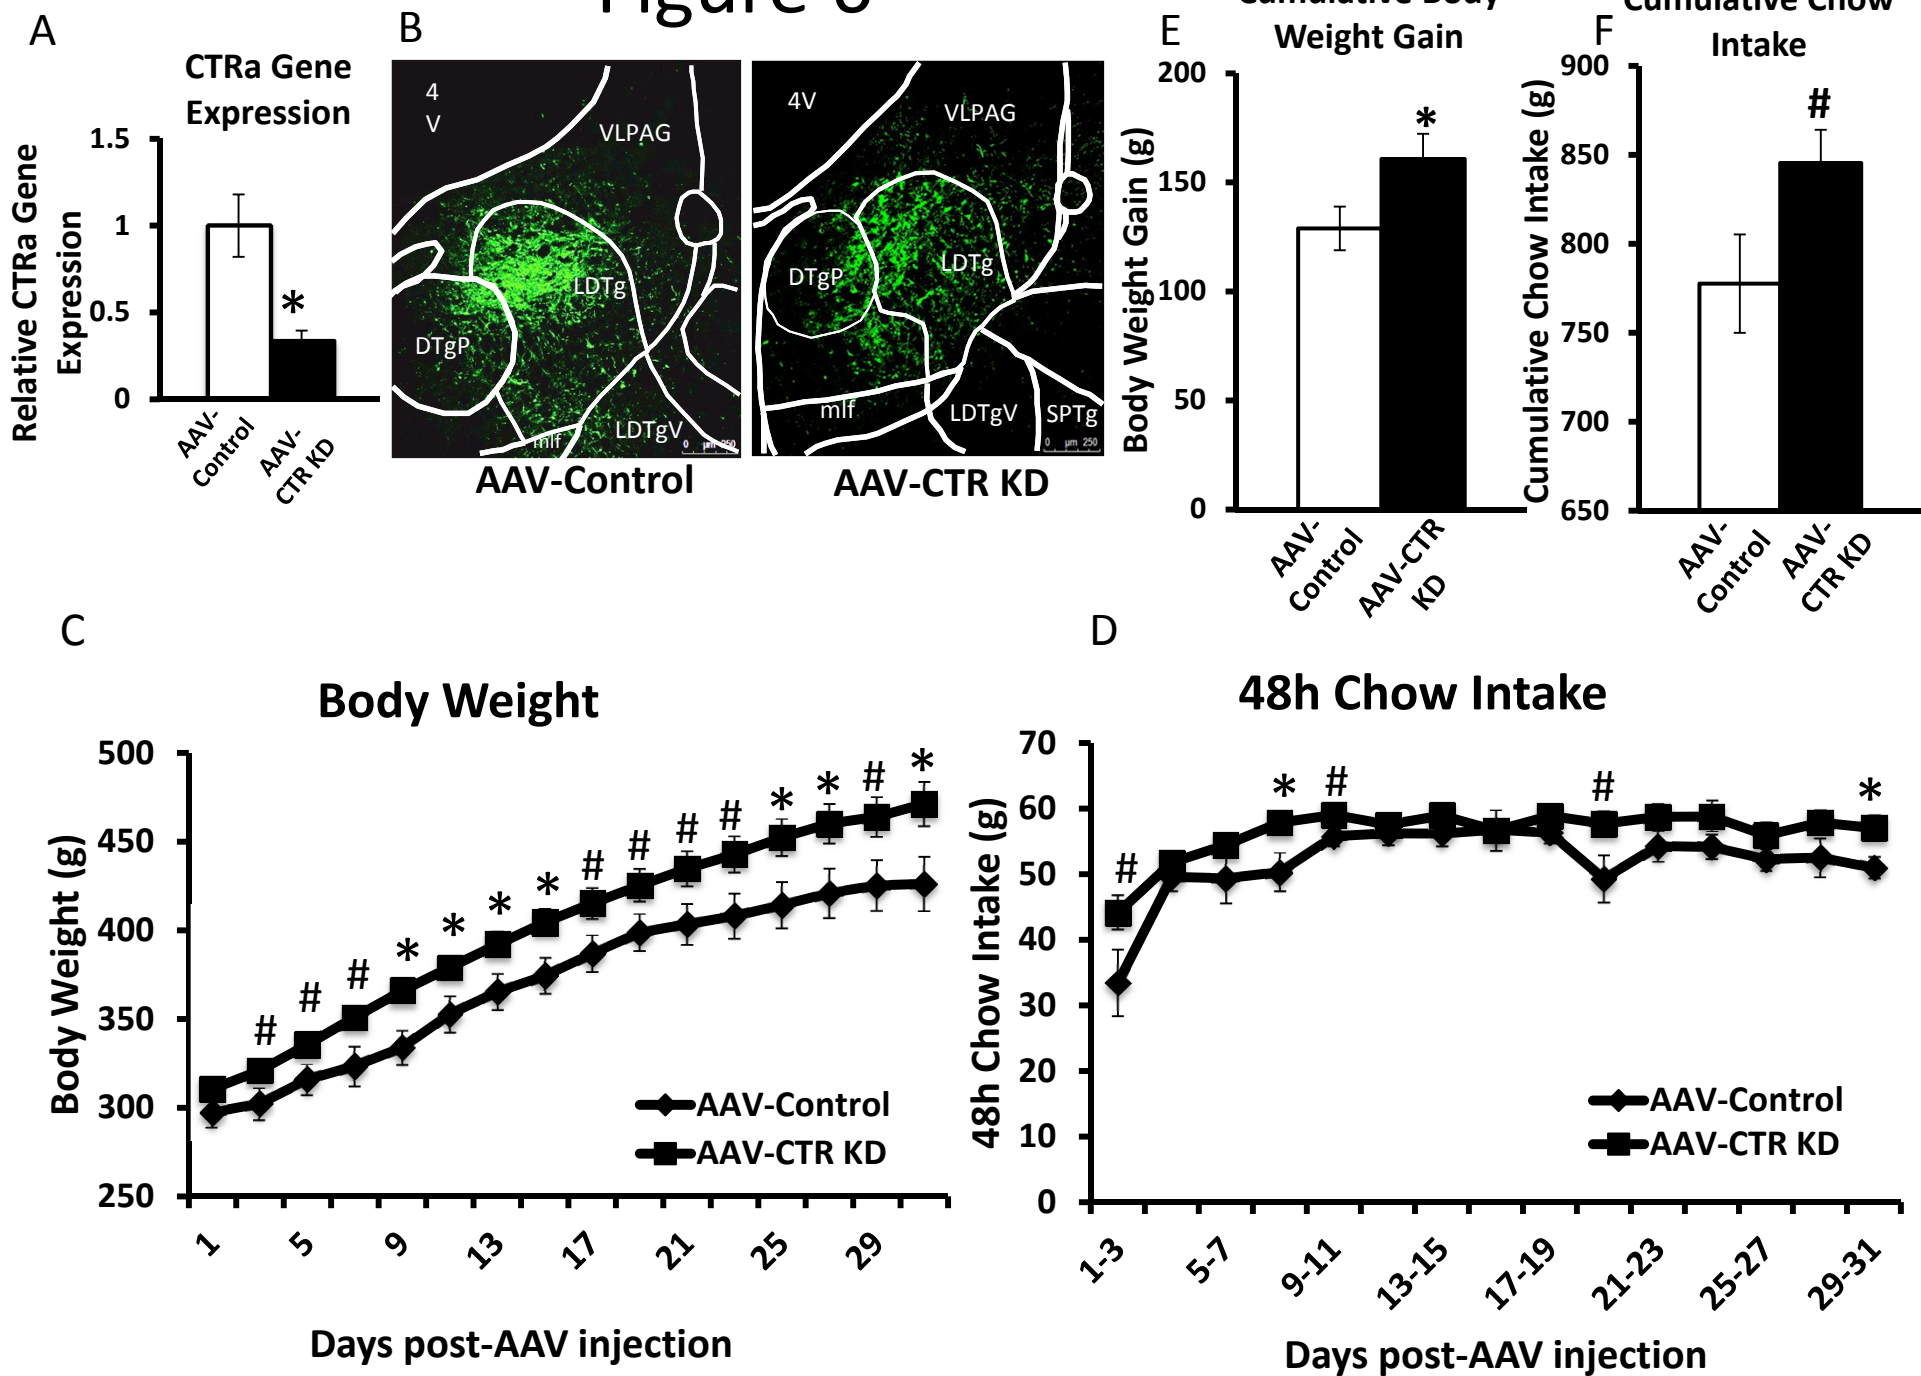

Supplement: NIHMS842459-supplement-6.pdf [file NIHMS842459-supplement-6.pdf]

Figure 7

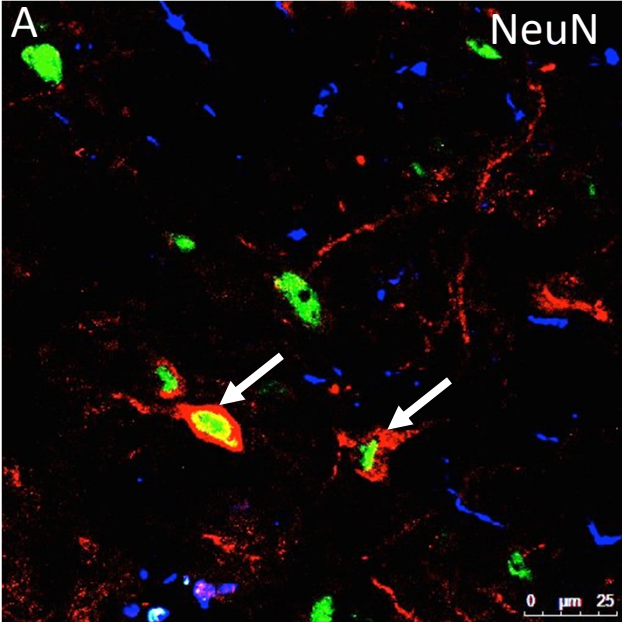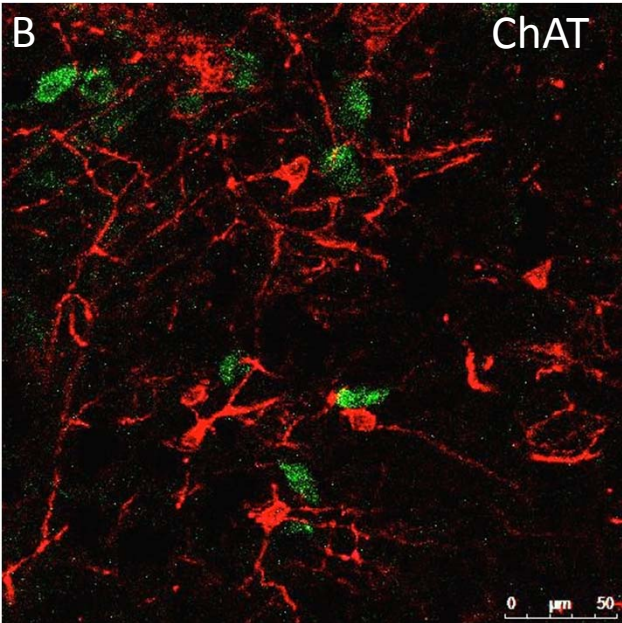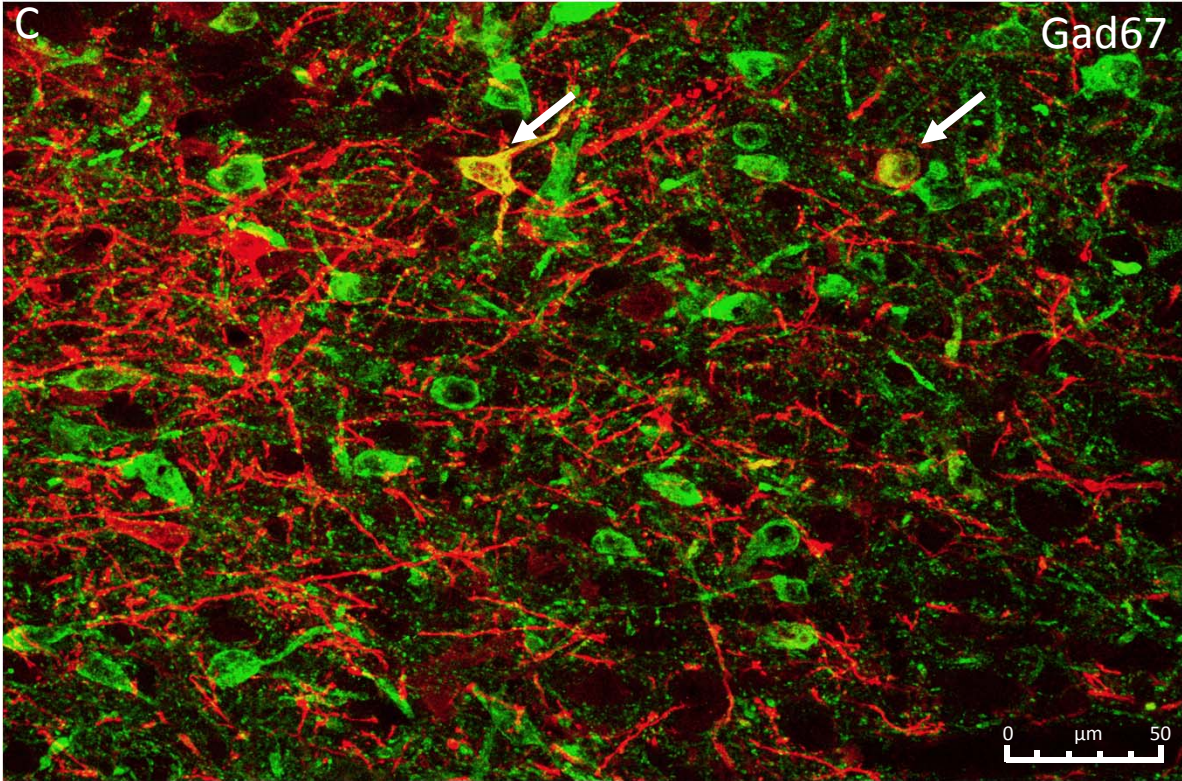

Supplement: NIHMS842459-supplement-7.pdf [file NIHMS842459-supplement-7.pdf]

Figure 8

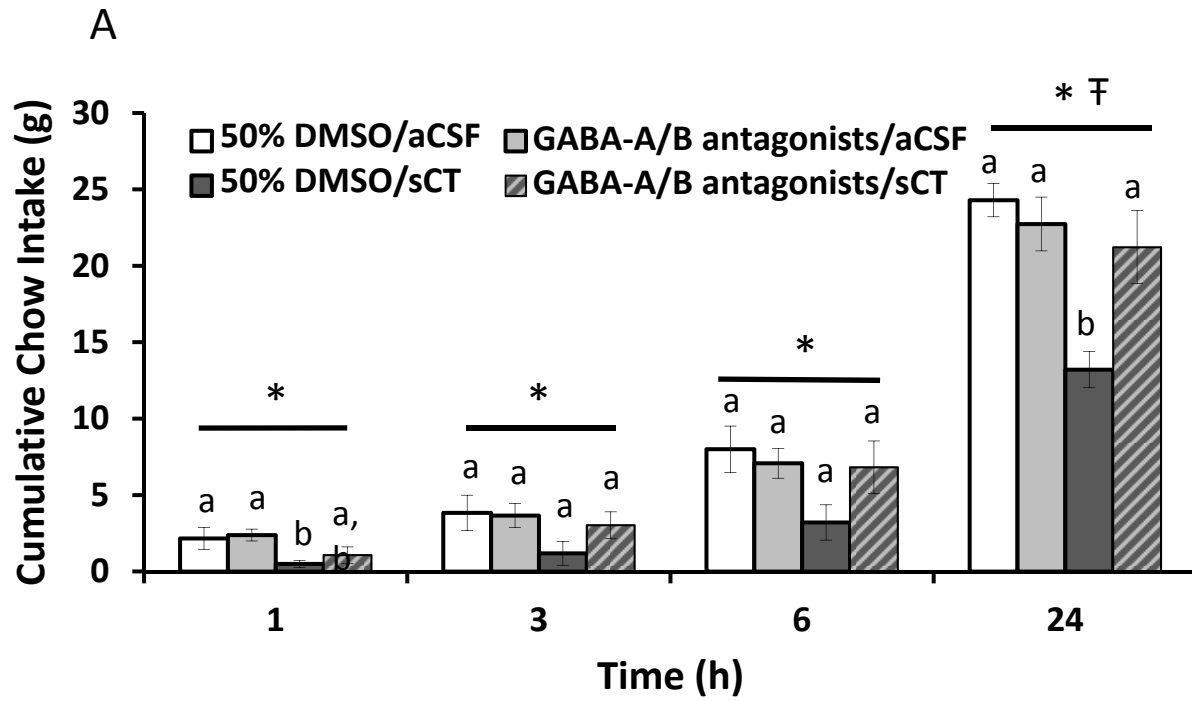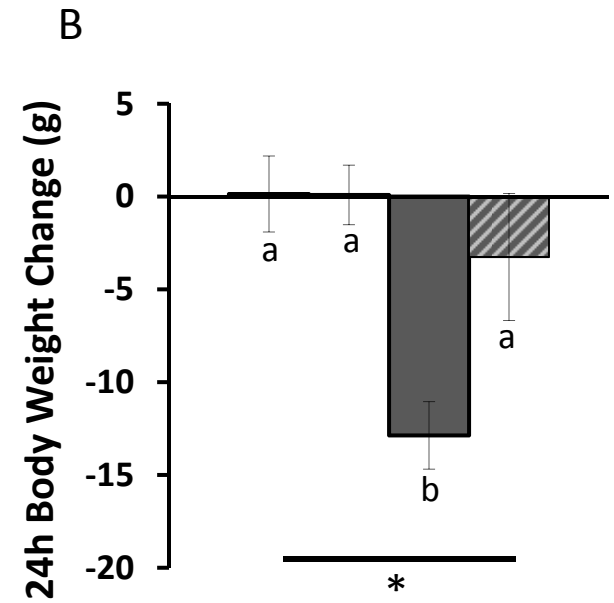

Supplement: NIHMS842459-supplement-8.pdf [file NIHMS842459-supplement-8.pdf]
